# Supplementary material
Source: publisher figshare collection journal article supplement (https://karger.figshare.com/ndownloader/files/30937552)
Supplement: Supplementary file 1 [file 30937552]

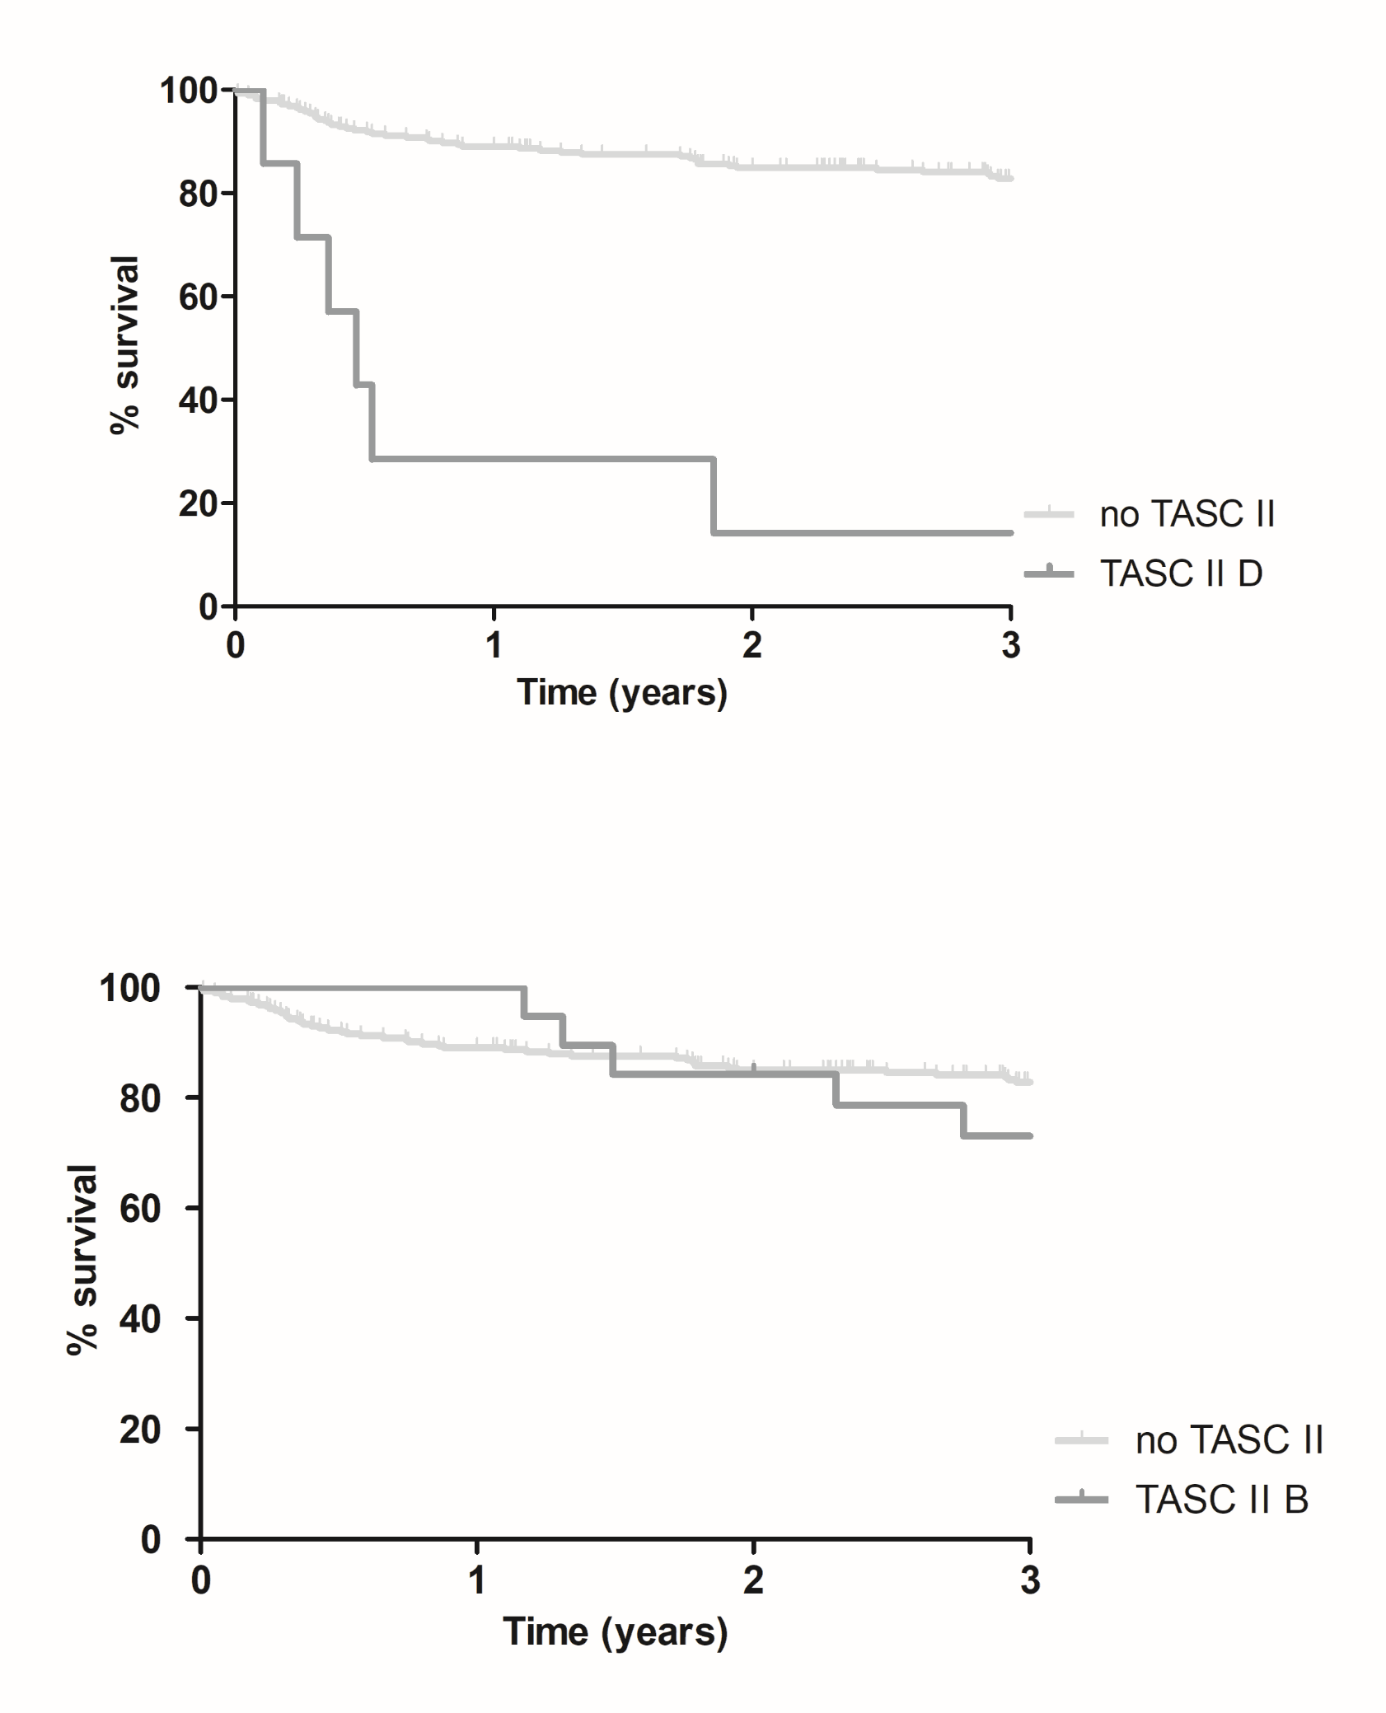

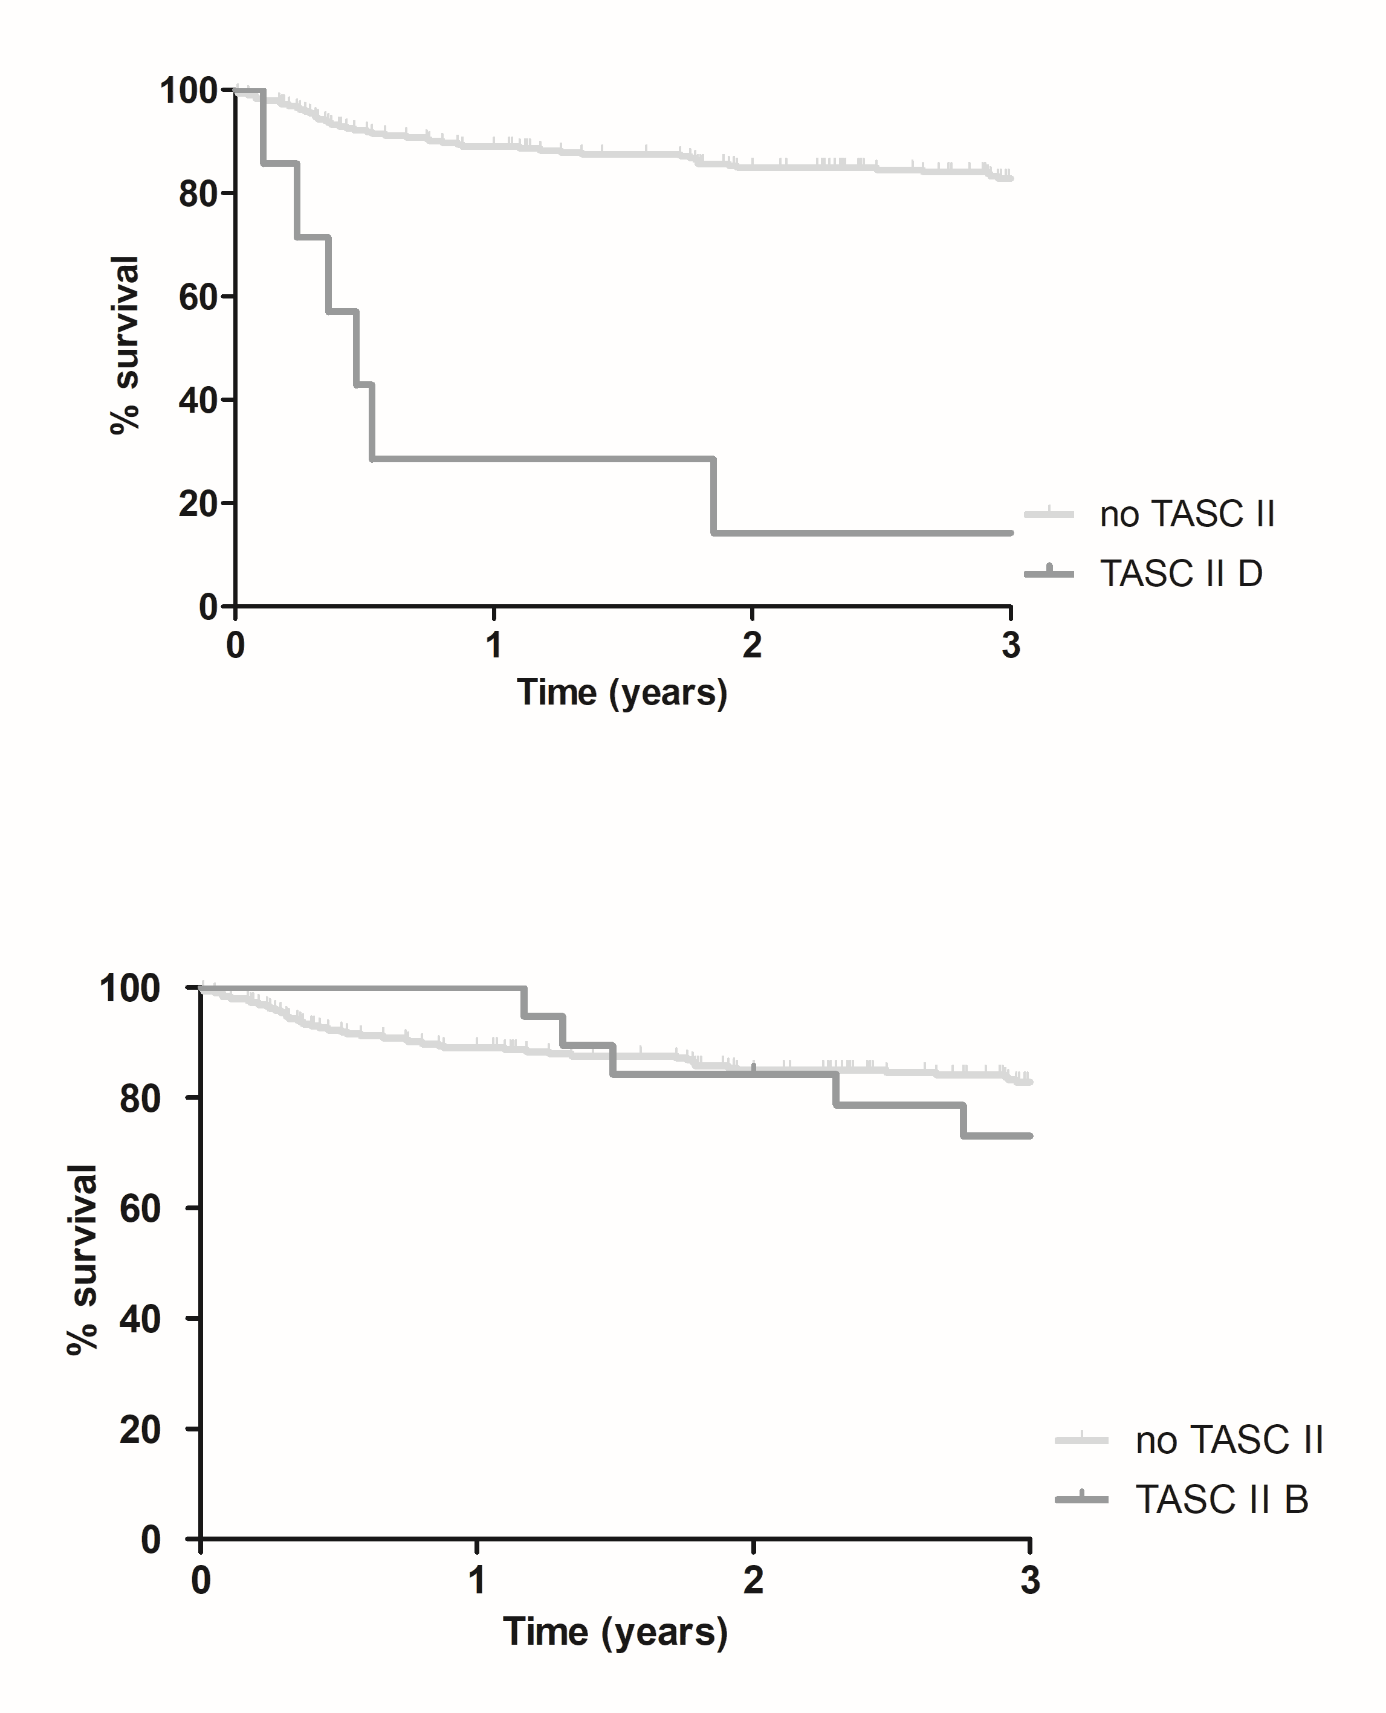


**B**

**A**

**Figure S1.** Survival curves of transplanted patients in Erasmus Medical Center with **A.** TASC D (the first case) and **B.** TASC B (the second case)
